# Supplementary material
Source: PubMed Central journal article supplement (PMC1360577)

*Ngn1*<sup>+/-</sup> *Ngn2*<sup>+/-</sup>

*Ngn1*<sup>-/-</sup> *Ngn2*<sup>+/-</sup>

*Ngn1*<sup>+/-</sup> *Ngn2*<sup>-/-</sup>

*Ngn1*<sup>-/-</sup> *Ngn2*<sup>-/-</sup>

*RhoA* sense

*RhoA*

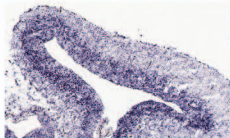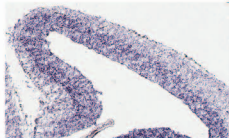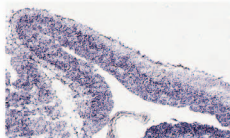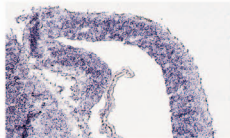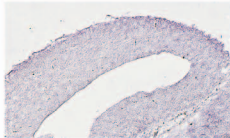

*Ngn1*<sup>+/-</sup> *Ngn2*<sup>+/-</sup>

*Ngn1*<sup>-/-</sup> *Ngn2*<sup>+/-</sup>

*Ngn1*<sup>+/-</sup> *Ngn2*<sup>-/-</sup>

*Ngn1*<sup>-/-</sup> *Ngn2*<sup>-/-</sup>

*p35* sense

*p35*

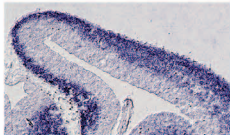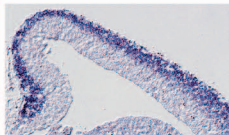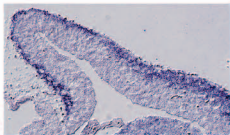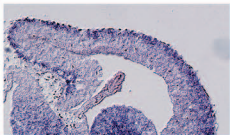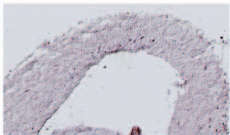

Supplement: pnas_0510419103_5.pdf [file pnas_0510419103_5.pdf]
