# Supplementary material
Source: PubMed Central journal article supplement (PMC1360577)

# Northern Blot

**con**      **Ngn1**

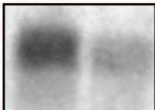

**RhoA**

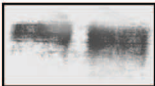

**28S RNA**

Supplement: pnas_0510419103_1.pdf [file pnas_0510419103_1.pdf]

**a**

RhoA mRNA fold change

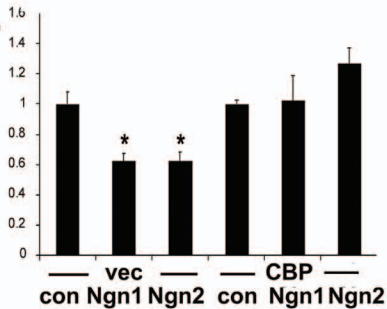**b**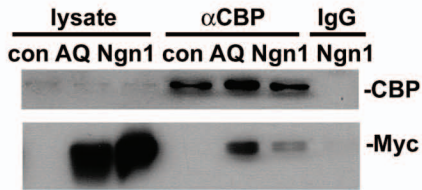**c**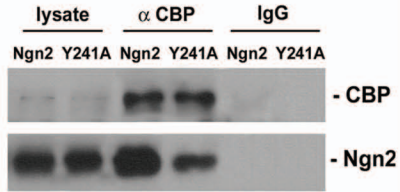

Supplement: pnas_0510419103_10.pdf [file pnas_0510419103_10.pdf]

Proneural bHLH factors

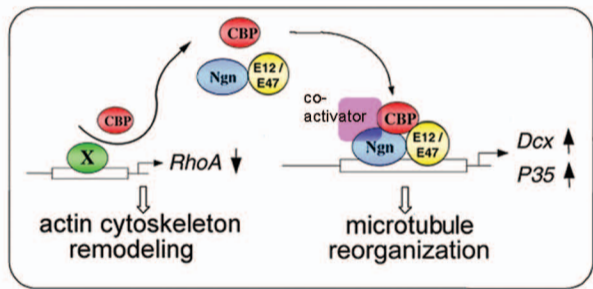

Cell migration

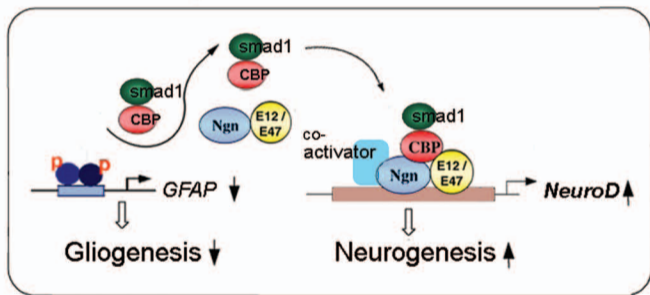

Neurogenesis

Supplement: pnas_0510419103_11.pdf [file pnas_0510419103_11.pdf]

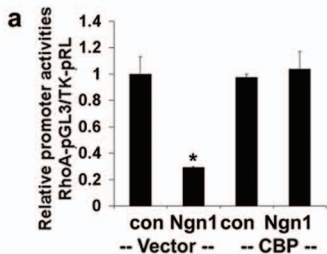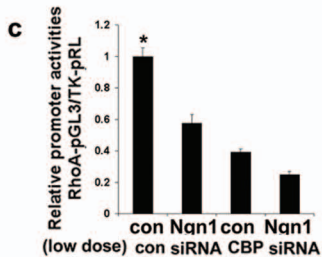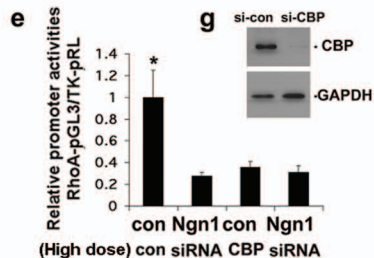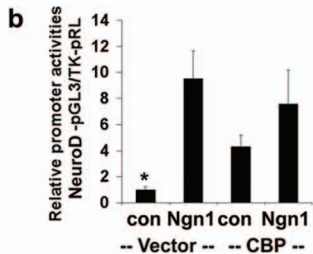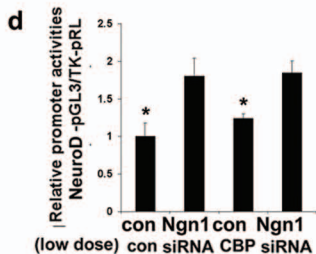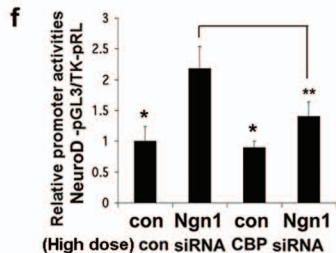

Supplement: pnas_0510419103_12.pdf [file pnas_0510419103_12.pdf]

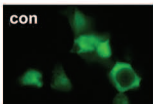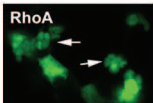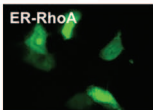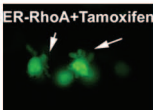

Supplement: pnas_0510419103_13.pdf [file pnas_0510419103_13.pdf]

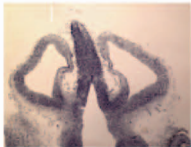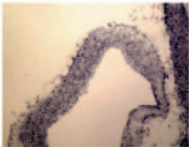

**E11  
RhoA**

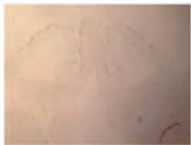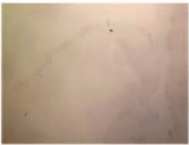

**E11  
sense**

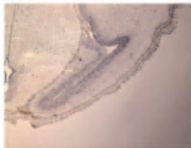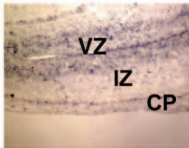

**VZ**

**IZ**

**CP**

**E14  
RhoA**

Supplement: pnas_0510419103_2.pdf [file pnas_0510419103_2.pdf]

**a**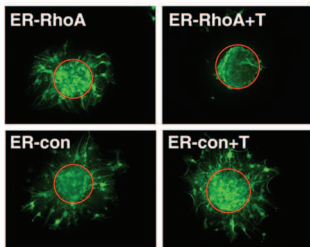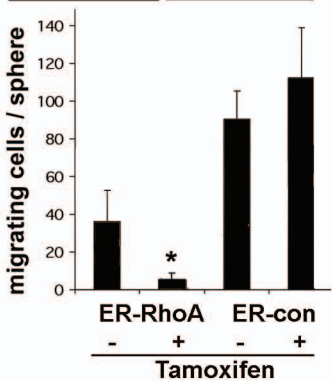**b**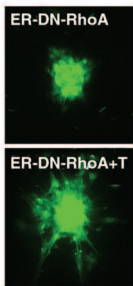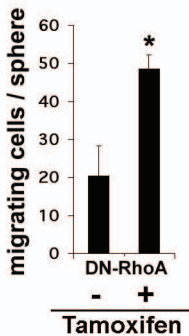

Supplement: pnas_0510419103_3.pdf [file pnas_0510419103_3.pdf]

**Number of migrated cells**

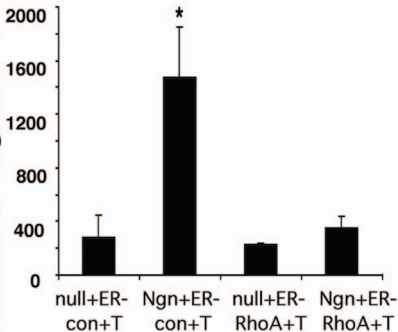

Supplement: pnas_0510419103_4.pdf [file pnas_0510419103_4.pdf]

**Ngn2<sup>+/+</sup>**

**Ngn2<sup>-/-</sup>**

**Ngn2<sup>+/+</sup>**

**Ngn2<sup>-/-</sup>**

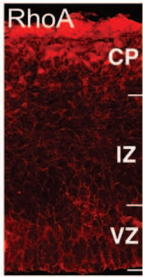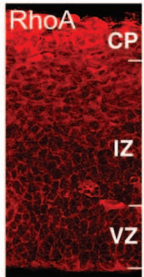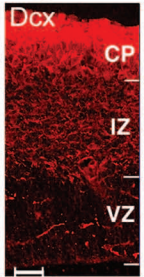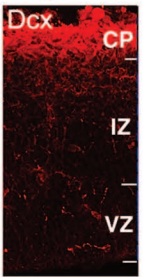

Supplement: pnas_0510419103_6.pdf [file pnas_0510419103_6.pdf]

# NPC

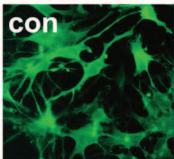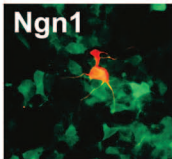

# Astrocyte

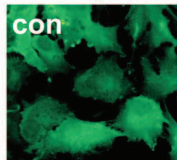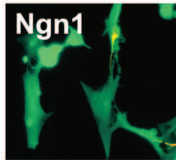

GFP, TuJ1

Supplement: pnas_0510419103_7.pdf [file pnas_0510419103_7.pdf]

**a**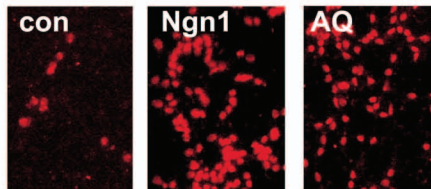**b**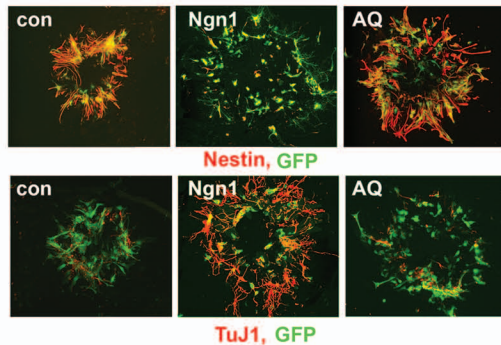**c**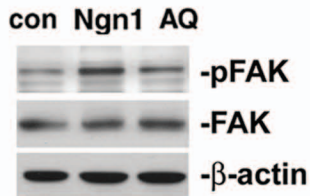**d**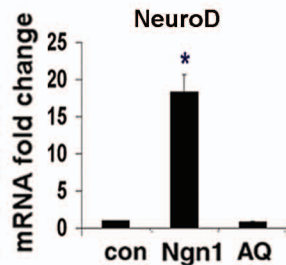

Nestin+/total cells

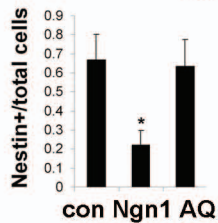

Tuj1+/total cells

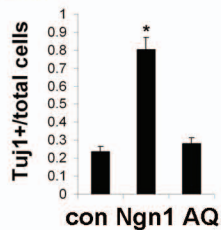

Supplement: pnas_0510419103_8.pdf [file pnas_0510419103_8.pdf]

**a**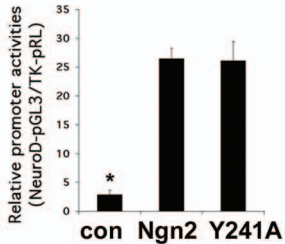**b**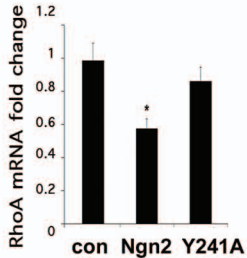**c**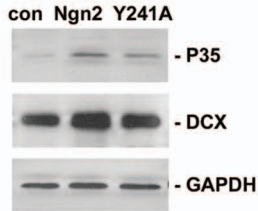

Supplement: pnas_0510419103_9.pdf [file pnas_0510419103_9.pdf]
